# Supplementary material for: The costs of transgenerational immune priming for homologous and heterologous infections with different serotypes of dengue virus in Aedes aegypti mosquitoes
Source: PubMed Central journal article supplement (PMC10760805; doi:10.3389/fimmu.2023.1286831), 2023-12-18
Supplement: DataSheet_1.pdf [file DataSheet_1.pdf]

**Table 1: Different tests for normal distribution analysis for relative expression of mRNA of antiviral immune response.**

|            |             | <b>Normality of Residuals</b> |                   |                |                              |
|------------|-------------|-------------------------------|-------------------|----------------|------------------------------|
|            |             | <b>Test name</b>              | <b>Statistics</b> | <b>P value</b> | <b>Passed normality test</b> |
| <b>DV2</b> | <b>AGO2</b> | Anderson-Darling              | 2.189             | <0.0001        | No                           |
|            |             | D'Agostino-Pearson omnibus    | 29.28             | <0.0001        | No                           |
|            |             | Shapiro-Wilk                  | 0.8135            | <0.0001        | No                           |
|            |             | Kolmogorov-Smirnov            | 0.2521            | <0.0001        | No                           |
|            | <b>DCR2</b> | Anderson-Darling              | 1.627             | 0.0003         | No                           |
|            |             | D'Agostino-Pearson omnibus    | 38.14             | <0.0001        | No                           |
|            |             | Shapiro-Wilk                  | 0.8053            | <0.0001        | No                           |
|            |             | Kolmogorov-Smirnov            | 0.1805            | 0.0021         | No                           |
|            | <b>R2D2</b> | Anderson-Darling              | 1.852             | <0.0001        | No                           |
|            |             | D'Agostino-Pearson omnibus    | 17.30             | 0.0002         | No                           |
|            |             | Shapiro-Wilk                  | 0.8544            | 0.0001         | No                           |
|            |             | Kolmogorov-Smirnov            | 0.2083            | 0.0001         | No                           |
| <b>DV4</b> | <b>AGO2</b> | Anderson-Darling              | 1.136             | 0.0050         | No                           |
|            |             | D'Agostino-Pearson omnibus    | 11.63             | 0.0030         | No                           |
|            |             | Shapiro-Wilk                  | 0.9110            | 0.0041         | No                           |
|            |             | Kolmogorov-Smirnov            | 0.1382            | 0.0524         | No                           |
|            | <b>DCR2</b> | Anderson-Darling              | 2.236             | <0.0001        | No                           |
|            |             | D'Agostino-Pearson omnibus    | 29.50             | <0.0001        | No                           |
|            |             | Shapiro-Wilk                  | 0.7970            | <0.0001        | No                           |
|            |             | Kolmogorov-Smirnov            | 0.2163            | <0.0001        | No                           |
|            | <b>R2D2</b> | Anderson-Darling              | 2.240             | <0.0001        | No                           |
|            |             | D'Agostino-Pearson omnibus    | 17.39             | 0.0002         | No                           |
|            |             | Shapiro-Wilk                  | 0.8552            | 0.0001         | No                           |
|            |             | Kolmogorov-Smirnov            | 0.2504            | <0.0001        | No                           |

**Table 2: Different tests for normal distribution analysis for biological parameters for DV2 and DV4.**

| <b>Normality of Residuals</b>  |                               |                            |                |                              |     |
|--------------------------------|-------------------------------|----------------------------|----------------|------------------------------|-----|
|                                | <b>Test name</b>              | <b>Statistics</b>          | <b>P value</b> | <b>Passed normality test</b> |     |
| <b>DV2</b>                     | <b>Oviposition</b>            | Anderson-Darling           | 0.2564         | 0.7162                       | Yes |
|                                |                               | D'Agostino-Pearson omnibus | 0.4817         | 0.7860                       | Yes |
|                                |                               | Shapiro-Wilk               | 0.9879         | 0.5509                       | Yes |
|                                |                               | Kolmogorov-Smirnov         | 0.05243        | 0.1000                       | Yes |
|                                | <b>Hatching percentage</b>    | Anderson-Darling           | 2.578          | <0.0001                      | No  |
|                                |                               | D'Agostino-Pearson omnibus | 9.283          | 0.0096                       | No  |
|                                |                               | Shapiro-Wilk               | 0.9147         | <0.0001                      | No  |
|                                |                               | Kolmogorov-Smirnov         | 0.1284         | 0.0007                       | No  |
|                                | <b>Percentage of pupation</b> | Anderson-Darling           | 3.244          | <0.0001                      | No  |
|                                |                               | D'Agostino-Pearson omnibus | 17.22          | 0.0002                       | No  |
|                                |                               | Shapiro-Wilk               | 0.8943         | <0.0001                      | No  |
|                                |                               | Kolmogorov-Smirnov         | 0.1549         | <0.0001                      | No  |
| <b>Percentage of emergence</b> | Anderson-Darling              | 0.7865                     | 0.0397         | No                           |     |
|                                | D'Agostino-Pearson omnibus    | 4.591                      | 0.1007         | Yes                          |     |
|                                | Shapiro-Wilk                  | 0.9599                     | 0.0103         | No                           |     |
|                                | Kolmogorov-Smirnov            | 0.1060                     | 0.0208         | No                           |     |
| <b>DV4</b>                     | <b>Oviposition</b>            | Anderson-Darling           | 0.2124         | 0.8500                       | Yes |
|                                |                               | D'Agostino-Pearson omnibus | 0.3104         | 0.8563                       | Yes |
|                                |                               | Shapiro-Wilk               | 0.9908         | 0.8455                       | Yes |

|                                |                            |         |         |     |
|--------------------------------|----------------------------|---------|---------|-----|
| <b>Hatching percentage</b>     | Kolmogorov-Smirnov         | 0.06182 | 0.1000  | Yes |
|                                | Anderson-Darling           | 1.608   | 0.0004  | No  |
| <b>Percentage of pupation</b>  | D'Agostino-Pearson omnibus | 7.008   | 0.0301  | No  |
|                                | Shapiro-Wilk               | 0.9395  | 0.0009  | No  |
|                                | Kolmogorov-Smirnov         | 0.1261  | 0.0031  | No  |
|                                | Anderson-Darling           | 2.473   | <0.0001 | No  |
| <b>Percentage of emergence</b> | D'Agostino-Pearson omnibus | 9.004   | 0.0111  | No  |
|                                | Shapiro-Wilk               | 0.9262  | 0.0003  | No  |
|                                | Kolmogorov-Smirnov         | 0.1705  | <0.0001 | No  |
|                                | Anderson-Darling           | 1.707   | 0.0002  | No  |
|                                | D'Agostino-Pearson omnibus | 21.03   | <0.0001 | No  |
|                                | Shapiro-Wilk               | 0.9287  | 0.0003  | No  |
|                                | Kolmogorov-Smirnov         | 0.1313  | 0.0022  | No  |

**Table 3: One-way ANOVA analysis and Tukey's multiple comparisons test for biological parameters per treatments (DV2 and DV4).**

|                                |                                | ANOVA              | SS        | DF    | MS    | F (DFn, DFd)       | P value           |          |
|--------------------------------|--------------------------------|--------------------|-----------|-------|-------|--------------------|-------------------|----------|
| DV2                            | <b>Oviposition</b>             | Residual           | 39044     | 89    | 438.7 |                    |                   |          |
|                                |                                | Treatment          | 7679      | 3     | 2560  | F (3, 89) = 5.834  | P=0.0011          |          |
|                                | <b>Hatching percentage</b>     | Residual           | 70418     | 89    | 791.2 |                    |                   |          |
|                                |                                | Treatment          | 2137      | 3     | 712.4 | F (3, 89) = 0.9003 | P=0.4444          |          |
|                                | <b>Percentage of pupation</b>  | Residual           | 6683      | 3     | 2228  | F (3, 82) = 6.241  | P=0.0007          |          |
|                                |                                | Treatment          | 29268     | 82    | 356.9 |                    |                   |          |
|                                | <b>Percentage of emergence</b> | Residual           | 24505     | 80    | 306.3 |                    |                   |          |
|                                |                                | Treatment          | 1773      | 3     | 591.1 | F (3, 80) = 1.930  | P=0.1314          |          |
|                                | DV4                            | <b>Oviposition</b> | Residual  | 31476 | 76    | 414.2              |                   |          |
|                                |                                |                    | Treatment | 13898 | 3     | 4633               | F (3, 76) = 11.19 | P<0.0001 |
| <b>Hatching</b>                |                                | Residual           | 54213     | 76    | 713.3 |                    |                   |          |
|                                |                                | Treatment          | 925.2     | 3     | 308.4 | F (3, 76) = 0.4323 | P=0.7305          |          |
| <b>Percentage of pupation</b>  |                                | Residual           | 23069     | 72    | 320.4 |                    |                   |          |
|                                |                                | Treatment          | 12642     | 3     | 4214  | F (3, 72) = 13.15  | P<0.0001          |          |
| <b>Percentage of emergence</b> |                                | Residual           | 22993     | 73    | 315.0 |                    |                   |          |
|                                |                                | Treatment          | 12539     | 3     | 4180  | F (3, 73) = 13.27  | P<0.0001          |          |

|                                | Tukey's multiple comparisons test | 95.00% CI of diff. | Summary | Adjusted P Value |
|--------------------------------|-----------------------------------|--------------------|---------|------------------|
| <b>Oviposition</b>             | Ctrl vs. UnPr-DV4act              | -26.81 to 10.44    | ns      | 0.6573           |
|                                | Ctrl vs. PrHmDV4                  | -16.83 to 15.86    | ns      | 0.9998           |
|                                | Ctrl vs. PrHtDV4                  | 9.864 to 42.55     | ***     | 0.0004           |
|                                | UnPr-DV4act vs. PrHmDV4           | -10.42 to 25.82    | ns      | 0.6809           |
|                                | UnPr-DV4act vs. PrHtDV4           | 16.27 to 52.52     | ****    | <0.0001          |
|                                | PrHmDV4 vs. PrHtDV4               | 10.93 to 42.46     | ***     | 0.0002           |
| <b>Hatching</b>                | Ctrl vs. UnPr-DV4act              | -20.66 to 28.24    | ns      | 0.9770           |
|                                | Ctrl vs. PrHmDV4                  | -27.29 to 15.61    | ns      | 0.8910           |
|                                | Ctrl vs. PrHtDV4                  | -24.72 to 18.18    | ns      | 0.9781           |
|                                | UnPr-DV4act vs. PrHmDV4           | -33.41 to 14.15    | ns      | 0.7126           |
|                                | UnPr-DV4act vs. PrHtDV4           | -30.84 to 16.72    | ns      | 0.8632           |
|                                | PrHmDV4 vs. PrHtDV4               | -18.12 to 23.25    | ns      | 0.9880           |
| <b>Percentage of pupation</b>  | Ctrl vs. UnPr-DV4act              | -7.847 to 26.04    | ns      | 0.4960           |
|                                | Ctrl vs. PrHmDV4                  | -8.022 to 21.17    | ns      | 0.6385           |
|                                | Ctrl vs. PrHtDV4                  | 17.97 to 47.78     | ****    | <0.0001          |
|                                | UnPr-DV4act vs. PrHmDV4           | -18.86 to 13.81    | ns      | 0.9771           |
|                                | UnPr-DV4act vs. PrHtDV4           | 7.160 to 40.39     | **      | 0.0019           |
|                                | PrHmDV4 vs. PrHtDV4               | 12.09 to 40.51     | ****    | <0.0001          |
| <b>Percentage of emergence</b> | Ctrl vs. UnPr-DV4act              | -11.95 to 21.29    | ns      | 0.8812           |
|                                | Ctrl vs. PrHmDV4                  | -10.60 to 17.93    | ns      | 0.9061           |
|                                | Ctrl vs. PrHtDV4                  | -40.39 to -11.24   | ****    | <0.0001          |
|                                | UnPr-DV4act vs. PrHmDV4           | -17.20 to 15.19    | ns      | 0.9984           |
|                                | UnPr-DV4act vs. PrHtDV4           | -46.95 to -14.02   | ****    | <0.0001          |
|                                | PrHmDV4 vs. PrHtDV4               | -43.56 to -15.40   | ****    | <0.0001          |

|                                |                         |                  |    |        |
|--------------------------------|-------------------------|------------------|----|--------|
| <b>Oviposition</b>             | Ctrl vs. UnPr-DV2act    | -16.73 to 20.73  | ns | 0.9923 |
|                                | Ctrl vs. PrHmDV2        | 0.08040 to 32.19 | *  | 0.0484 |
|                                | Ctrl vs. PrHtDV2        | 5.869 to 37.53   | ** | 0.0030 |
|                                | UnPr-DV2act vs. PrHmDV2 | -3.411 to 31.68  | ns | 0.1581 |
|                                | UnPr-DV2act vs. PrHtDV2 | 2.358 to 37.04   | *  | 0.0194 |
|                                | PrHmDV2 vs. PrHtDV2     | -8.846 to 19.97  | ns | 0.7434 |
| <b>Hatching</b>                | Ctrl vs. UnPr-DV2act    | -23.67 to 26.64  | ns | 0.9987 |
|                                | Ctrl vs. PrHmDV2        | -32.24 to 10.89  | ns | 0.5676 |
|                                | Ctrl vs. PrHtDV2        | -23.15 to 19.37  | ns | 0.9955 |
|                                | UnPr-DV2act vs. PrHmDV2 | -35.73 to 11.40  | ns | 0.5330 |
|                                | UnPr-DV2act vs. PrHtDV2 | -26.67 to 19.91  | ns | 0.9812 |
|                                | PrHmDV2 vs. PrHtDV2     | -10.57 to 28.14  | ns | 0.6356 |
| <b>Percentage of pupation</b>  | Ctrl vs. UnPr-DV2act    | -15.43 to 18.79  | ns | 0.9940 |
|                                | Ctrl vs. PrHmDV2        | -8.538 to 20.91  | ns | 0.6893 |
|                                | Ctrl vs. PrHtDV2        | 6.921 to 37.35   | ** | 0.0015 |
|                                | UnPr-DV2act vs. PrHmDV2 | -11.34 to 20.36  | ns | 0.8781 |
|                                | UnPr-DV2act vs. PrHtDV2 | 4.150 to 36.76   | ** | 0.0079 |
|                                | PrHmDV2 vs. PrHtDV2     | 2.165 to 29.73   | *  | 0.0167 |
| <b>Percentage of emergence</b> | Ctrl vs. UnPr-DV2act    | -14.29 to 18.77  | ns | 0.9844 |
|                                | Ctrl vs. PrHmDV2        | -17.06 to 10.24  | ns | 0.9131 |
|                                | Ctrl vs. PrHtDV2        | -24.42 to 3.782  | ns | 0.2279 |
|                                | UnPr-DV2act vs. PrHmDV2 | -21.07 to 9.756  | ns | 0.7707 |
|                                | UnPr-DV2act vs. PrHtDV2 | -28.38 to 3.251  | ns | 0.1670 |
|                                | PrHmDV2 vs. PrHtDV2     | -19.68 to 5.868  | ns | 0.4916 |

**Table 4: Chi-square test analysis for sex ratio pairwise comparisons for DV2 and DV4.**

| <b>Chi-square test</b>      |                             |                          |                          |                             |                          |                          |
|-----------------------------|-----------------------------|--------------------------|--------------------------|-----------------------------|--------------------------|--------------------------|
| <b>Sex ratio</b>            |                             |                          |                          |                             |                          |                          |
| <b>Pairwise comparisons</b> | <b>Ctrl vs. UnPr-DV2act</b> | <b>Ctrl vs. PrHmDV 2</b> | <b>Ctrl vs. PrHtD V2</b> | <b>Ctrl vs. UnPr-DV4act</b> | <b>Ctrl vs. PrHmDV 4</b> | <b>Ctrl vs. PrHtDV 4</b> |
| <b>Chi-square</b>           | 6.972                       | 4.294                    | 2.103                    | 3.067                       | 2.070                    | 4.451                    |
| <b>DF</b>                   | 1                           | 1                        | 1                        | 1                           | 1                        | 1                        |
| <b>P value (two-tailed)</b> | 0.0083                      | 0.0382                   | 0.1470                   | 0.0799                      | 0.1502                   | 0.0349                   |
| <b>P value summary</b>      | **                          | *                        | ns                       | ns                          | ns                       | *                        |

**Table 5: Two-way ANOVA analysis and Tukey's multiple comparisons test for relative expression mRNA for antiviral immune response per treatment (DV2 and DV4).**

| <b>DV2</b> | <b>AGO2</b> | <b>ANOVA</b> | <b>SS</b> | <b>DF</b> | <b>MS</b> | <b>F (DFn, DFd)</b> | <b>P value</b> |
|------------|-------------|--------------|-----------|-----------|-----------|---------------------|----------------|
|            |             | Individual   | 2329      | 7         | 332.8     | F (7, 28) = 0.5581  | P=0.7830       |
|            |             | Treatment    | 21341     | 4         | 5335      | F (4, 28) = 8.948   | P<0.0001       |
|            | <b>DCR2</b> | Individual   | 243.2     | 7         | 34.75     | F (7, 28) = 0.8748  | P=0.8748       |
|            |             | Treatment    | 1599      | 4         | 399.8     | F (4, 28) = 10.07   | P<0.0001       |
|            | <b>R2D2</b> | Individual   | 23374     | 7         | 3339      | F (7, 28) = 1.363   | P=0.2592       |
|            |             | Treatment    | 77130     | 4         | 19283     | F (4, 28) = 7.874   | P=0.0002       |
| <b>DV4</b> | <b>AGO2</b> | Individual   | 3.258     | 7         | 0.4654    | F (7, 28) = 1.096   | P=0.3925       |
|            |             | Treatment    | 30.99     | 4         | 7.748     | F (4, 28) = 18.25   | P<0.0001       |
|            | <b>DCR2</b> | Individual   | 5.342     | 7         | 0.7632    | F (7, 28) = 0.5085  | P=0.8202       |
|            |             | Treatment    | 64.41     | 4         | 16.10     | F (4, 28) = 10.73   | P<0.0001       |
|            | <b>R2D2</b> | Individual   | 4.872     | 7         | 0.6960    | F (7, 28) = 0.3045  | P=0.9459       |
|            |             | Treatment    | 71.52     | 4         | 17.88     | F (4, 28) = 7.822   | P=0.0002       |



|             | Tukey's multiple comparisons test | 95.00% CI of diff. | Summary | Adjusted P Value |
|-------------|-----------------------------------|--------------------|---------|------------------|
| <b>AGO2</b> | Ctrl vs. UnPr-DV2active           | 14.61 to 85.75     | **      | 0.0027           |
|             | Ctrl vs. PrHmDV2                  | 15.18 to 86.32     | **      | 0.0024           |
|             | Ctrl vs. PrHtDV2                  | 15.11 to 86.25     | **      | 0.0024           |
|             | Ctrl vs. DV2                      | -28.33 to 42.81    | ns      | 0.9750           |
|             | UnPr-DV2active vs. PrHmDV2        | -35.00 to 36.14    | ns      | >0.9999          |
|             | UnPr-DV2active vs. PrHtDV2        | -35.07 to 36.07    | ns      | >0.9999          |
|             | UnPr-DV2active vs. DV2            | -78.51 to -7.366   | *       | 0.0121           |
|             | PrHmDV2 vs. PrHtDV2               | -35.64 to 35.50    | ns      | >0.9999          |
|             | PrHmDV2 vs. DV2                   | -79.08 to -7.934   | *       | 0.0108           |
|             | PrHtDV2 vs. DV2                   | -79.01 to -7.867   | *       | 0.0109           |
| <b>DCR2</b> | Ctrl vs. UnPr-DV2active           | -9.582 to 8.780    | ns      | >0.9999          |
|             | Ctrl vs. PrHmDV2                  | -11.79 to 6.572    | ns      | 0.9197           |
|             | Ctrl vs. PrHtDV2                  | -10.14 to 8.217    | ns      | 0.9980           |
|             | Ctrl vs. DV2                      | -25.82 to -7.463   | ***     | 0.0001           |
|             | UnPr-DV2active vs. PrHmDV2        | -11.39 to 6.973    | ns      | 0.9547           |
|             | UnPr-DV2active vs. PrHtDV2        | -9.743 to 8.618    | ns      | 0.9998           |
|             | UnPr-DV2active vs. DV2            | -25.42 to -7.062   | ***     | 0.0002           |
|             | PrHmDV2 vs. PrHtDV2               | -7.536 to 10.83    | ns      | 0.9844           |
|             | PrHmDV2 vs. DV2                   | -23.22 to -4.854   | **      | 0.0011           |
|             | PrHtDV2 vs. DV2                   | -24.86 to -6.499   | ***     | 0.0003           |
| <b>R2D2</b> | Ctrl vs. UnPr-DV2active           | -57.56 to 86.62    | ns      | 0.9759           |
|             | Ctrl vs. PrHmDV2                  | -56.93 to 87.25    | ns      | 0.9719           |
|             | Ctrl vs. PrHtDV2                  | -57.75 to 86.43    | ns      | 0.9770           |
|             | Ctrl vs. DV2                      | -169.9 to -25.76   | **      | 0.0040           |

|             |                            |                   |      |         |
|-------------|----------------------------|-------------------|------|---------|
|             | UnPr-DV2active vs. PrHmDV2 | -71.46 to 72.72   | ns   | >0.9999 |
|             | UnPr-DV2active vs. PrHtDV2 | -72.28 to 71.90   | ns   | >0.9999 |
|             | UnPr-DV2active vs. DV2     | -184.5 to -40.29  | ***  | 0.0009  |
|             | PrHmDV2 vs. PrHtDV2        | -72.91 to 71.27   | ns   | >0.9999 |
|             | PrHmDV2 vs. DV2            | -185.1 to -40.92  | ***  | 0.0008  |
|             | PrHtDV2 vs. DV2            | -184.3 to -40.10  | ***  | 0.0009  |
| <b>AGO2</b> | Ctrl vs. UnPr-DV4active    | 0.4868 to 2.385   | **   | 0.0012  |
|             | Ctrl vs. PrHmDV4           | 0.3005 to 2.199   | **   | 0.0054  |
|             | Ctrl vs. PrHtDV4           | 0.5687 to 2.467   | ***  | 0.0006  |
|             | Ctrl vs. DV4               | -1.617 to 0.2815  | ns   | 0.2697  |
|             | UnPr-DV4active vs. PrHmDV4 | -1.136 to 0.7630  | ns   | 0.9782  |
|             | UnPr-DV4active vs. PrHtDV4 | -0.8673 to 1.031  | ns   | 0.9991  |
|             | UnPr-DV4active vs. DV4     | -3.053 to -1.155  | **** | <0.0001 |
|             | PrHmDV4 vs. PrHtDV4        | -0.6811 to 1.218  | ns   | 0.9212  |
|             | PrHmDV4 vs. DV4            | -2.867 to -0.9683 | **** | <0.0001 |
|             | PrHtDV4 vs. DV4            | -3.135 to -1.237  | **** | <0.0001 |
| <b>DCR2</b> | Ctrl vs. UnPr-DV4active    | -0.1448 to 3.424  | ns   | 0.0833  |
|             | Ctrl vs. PrHmDV4           | -0.2367 to 3.333  | ns   | 0.1131  |
|             | Ctrl vs. PrHtDV4           | 0.1211 to 3.690   | *    | 0.0319  |
|             | Ctrl vs. DV4               | -3.209 to 0.3607  | ns   | 0.1670  |
|             | UnPr-DV4active vs. PrHmDV4 | -1.876 to 1.693   | ns   | 0.9999  |
|             | UnPr-DV4active vs. PrHtDV4 | -1.519 to 2.051   | ns   | 0.9922  |
|             | UnPr-DV4active vs. DV4     | -4.848 to -1.279  | ***  | 0.0002  |
|             | PrHmDV4 vs. PrHtDV4        | -1.427 to 2.142   | ns   | 0.9764  |
|             | PrHmDV4 vs. DV4            | -4.756 to -1.187  | ***  | 0.0004  |
|             | PrHtDV4 vs. DV4            | -5.114 to -1.545  | **** | <0.0001 |
| <b>R2D2</b> | Ctrl vs. UnPr-DV4active    | 0.2251 to 4.630   | *    | 0.0253  |
|             | Ctrl vs. PrHmDV4           | 0.1262 to 4.531   | *    | 0.0343  |
|             | Ctrl vs. PrHtDV4           | 0.3181 to 4.723   | *    | 0.0189  |

|                            |                   |    |         |
|----------------------------|-------------------|----|---------|
| Ctrl vs. DV4               | -2.757 to 1.647   | ns | 0.9466  |
| UnPr-DV4active vs. PrHmDV4 | -2.301 to 2.104   | ns | >0.9999 |
| UnPr-DV4active vs. PrHtDV4 | -2.109 to 2.295   | ns | >0.9999 |
| UnPr-DV4active vs. DV4     | -5.185 to -0.7801 | ** | 0.0041  |
| PrHmDV4 vs. PrHtDV4        | -2.011 to 2.394   | ns | 0.9990  |
| PrHmDV4 vs. DV4            | -5.086 to -0.6812 | ** | 0.0057  |
| PrHtDV4 vs. DV4            | -5.278 to -0.8731 | ** | 0.0030  |

**Table 6: Pairwise comparison using Mann Whitney U test for viral load per treatment (DV2 and DV4)**

| <b>Mann Whitney test</b>    |                             |                         |                         |                     |                                |                                |                            |                            |                        |                        |
|-----------------------------|-----------------------------|-------------------------|-------------------------|---------------------|--------------------------------|--------------------------------|----------------------------|----------------------------|------------------------|------------------------|
| <b>Pairwise comparisons</b> | <b>Ctrl vs. UnPr-DV4act</b> | <b>Ctrl vs. PrHmDV4</b> | <b>Ctrl vs. PrHtDV4</b> | <b>Ctrl vs. DV4</b> | <b>UnPr-DV4act vs. PrHmDV4</b> | <b>UnPr-DV4act vs. PrHtDV4</b> | <b>UnPr-DV4act vs. DV4</b> | <b>PrHmDV4 vs. PrHtDV4</b> | <b>PrHmDV4 vs. DV4</b> | <b>PrHtDV4 vs. DV4</b> |
| <b>Mann Whitney U</b>       | 6                           | 3                       | 6                       | 0                   | 11                             | 10                             | 0                          | 10                         | 0                      | 0                      |
| <b>P value</b>              | 0.1667                      | *0.0476                 | 0.1667                  | **0.0079            | 0.8333                         | 0.6508                         | **0.0079                   | 0.6905                     | **0.0079               | **0.0079               |
| <b>Sum of ranks</b>         | 21 , 34                     | 18 , 37                 | 21 , 34                 | 15 , 40             | 26 , 29                        | 25 , 30                        | 15 , 40                    | 25 , 30                    | 15 , 40                | 15 , 40                |

  

| <b>Mann Whitney test</b>    |                             |                         |                         |                     |                                |                                |                            |                            |                        |                        |
|-----------------------------|-----------------------------|-------------------------|-------------------------|---------------------|--------------------------------|--------------------------------|----------------------------|----------------------------|------------------------|------------------------|
| <b>Pairwise comparisons</b> | <b>Ctrl vs. UnPr-DV2act</b> | <b>Ctrl vs. PrHmDV2</b> | <b>Ctrl vs. PrHtDV2</b> | <b>Ctrl vs. DV2</b> | <b>UnPr-DV2act vs. PrHmDV2</b> | <b>UnPr-DV2act vs. PrHtDV2</b> | <b>UnPr-DV2act vs. DV2</b> | <b>PrHmDV2 vs. PrHtDV2</b> | <b>PrHmDV2 vs. DV2</b> | <b>PrHtDV2 vs. DV2</b> |
| <b>Mann Whitney U</b>       | 2                           | 0                       | 0                       | 0                   | 9                              | 9                              | 2                          | 12                         | 0                      | 0                      |
| <b>P value</b>              | *0.0317                     | **0.0079                | **0.0079                | **0.0079            | 0.4444                         | 0.4444                         | *0.0317                    | >0.9999                    | **0.0079               | **0.0079               |
| <b>Sum of ranks</b>         | 17 , 38                     | 15 , 40                 | 15 , 40                 | 15 , 40             | 31 , 24                        | 31 , 24                        | 17 , 38                    | 27 , 28                    | 15 , 40                | 15 , 40                |
