# Supplementary material for: The costs of transgenerational immune priming for homologous and heterologous infections with different serotypes of dengue virus in Aedes aegypti mosquitoes
Source: PubMed Central journal article supplement (PMC10760805; doi:10.3389/fimmu.2023.1286831), 2023-12-18
Supplement: DataSheet_2.pdf [file DataSheet_2.pdf]

**A**

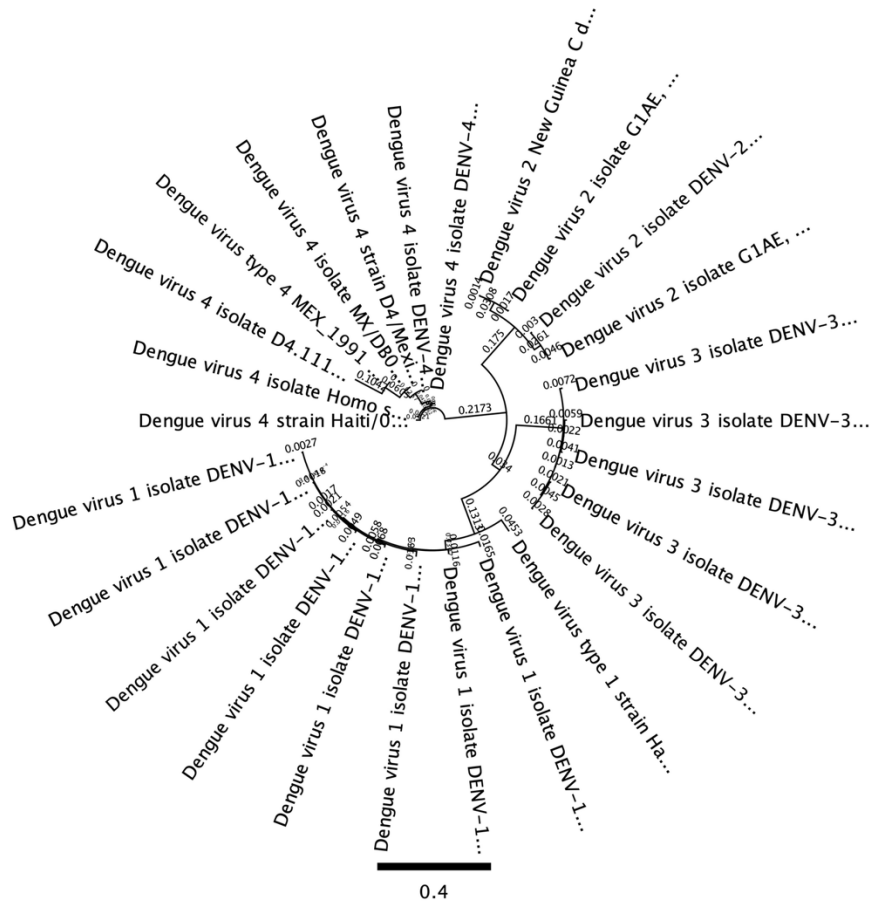

**B**

| D4_KT272673 | D4_MKS14144 | D4_AY152378 | D4_JF804055 | D4_HM171571 | D4_JF850059 | D4_JF882601 | D2_MH613085 | D2_GQ110000 | D2_MH710000 | D3_EU482555 | D3_FJ988442 | D3_FJ988440 | D3_EU482559 | D3_EU482595 | D1_DQ672563 | D1_EU482567 | D1_KJ189367 | D1_P478457 | D1_Q675338 | D1_KJ189368 | D1_KJ189369 | D1_KJ189370 | D1_GU131956 | D1_GU131960 |
|-------------|-------------|-------------|-------------|-------------|-------------|-------------|-------------|-------------|-------------|-------------|-------------|-------------|-------------|-------------|-------------|-------------|-------------|------------|------------|-------------|-------------|-------------|-------------|-------------|
| 96.74%      | 96.70%      | 96.90%      | 96.86%      | 97.43%      | 97.51%      | 66.12%      | 66.14%      | 66.10%      | 66.04%      | 66.08%      | 65.97%      | 66.13%      | 66.14%      | 66.10%      | 65.75%      | 65.76%      | 65.66%      | 65.83%     | 65.67%     | 65.67%      | 65.82%      | 66.01%      | 65.96%      | 65.96%      |
| 96.74%      | 97.22%      | 97.44%      | 97.34%      | 97.74%      | 97.73%      | 66.13%      | 66.19%      | 65.98%      | 65.95%      | 66.13%      | 66.03%      | 66.15%      | 66.21%      | 66.19%      | 65.66%      | 65.79%      | 65.50%      | 65.79%     | 65.56%     | 65.58%      | 65.72%      | 65.92%      | 65.86%      | 65.86%      |
| 96.70%      | 97.22%      | 98.38%      | 97.40%      | 97.68%      | 97.68%      | 66.65%      | 66.44%      | 66.49%      | 66.24%      | 64.38%      | 64.23%      | 64.28%      | 64.28%      | 64.02%      | 64.23%      | 64.69%      | 64.18%      | 64.95%     | 64.74%     | 64.79%      | 64.54%      | 64.69%      | 64.69%      | 64.69%      |
| 96.90%      | 97.44%      | 98.38%      | 98.63%      | 98.45%      | 98.18%      | 66.46%      | 66.26%      | 66.46%      | 66.26%      | 63.50%      | 63.03%      | 63.16%      | 63.10%      | 63.23%      | 63.84%      | 64.78%      | 64.98%      | 64.31%     | 64.98%     | 64.92%      | 65.05%      | 64.92%      | 64.98%      | 64.98%      |
| 96.86%      | 97.34%      | 97.40%      | 98.63%      | 98.70%      | 98.96%      | 66.46%      | 66.26%      | 66.26%      | 66.05%      | 63.80%      | 63.32%      | 63.46%      | 63.39%      | 63.52%      | 63.66%      | 64.41%      | 64.55%      | 64.07%     | 64.55%     | 64.62%      | 64.75%      | 64.48%      | 64.55%      | 64.55%      |
| 97.43%      | 97.74%      | 97.68%      | 98.45%      | 98.70%      | 98.96%      | 66.17%      | 66.11%      | 66.03%      | 65.99%      | 66.04%      | 65.99%      | 66.10%      | 66.12%      | 66.06%      | 65.57%      | 65.66%      | 65.45%      | 65.68%     | 65.49%     | 65.50%      | 65.66%      | 65.82%      | 65.78%      | 65.78%      |
| 97.51%      | 97.73%      | 97.68%      | 98.18%      | 98.43%      | 98.96%      | 66.14%      | 66.07%      | 66.05%      | 66.02%      | 66.02%      | 65.98%      | 66.12%      | 66.15%      | 66.09%      | 65.58%      | 65.67%      | 65.47%      | 65.69%     | 65.53%     | 65.53%      | 65.69%      | 65.85%      | 65.83%      | 65.83%      |
| 66.12%      | 66.13%      | 66.05%      | 66.46%      | 66.46%      | 66.17%      | 66.14%      | 66.07%      | 66.05%      | 66.02%      | 68.27%      | 68.15%      | 68.18%      | 68.17%      | 68.13%      | 68.05%      | 67.42%      | 67.95%      | 67.52%     | 67.48%     | 67.52%      | 67.73%      | 67.77%      | 67.80%      | 67.77%      |
| 66.14%      | 66.19%      | 66.44%      | 66.26%      | 66.26%      | 66.11%      | 66.07%      | 99.67%      | 94.40%      | 93.33%      | 68.27%      | 68.15%      | 68.18%      | 68.21%      | 68.20%      | 68.30%      | 68.09%      | 67.36%      | 68.01%     | 67.45%     | 67.41%      | 67.57%      | 67.77%      | 67.80%      | 67.80%      |
| 66.10%      | 65.98%      | 66.49%      | 66.46%      | 66.26%      | 66.03%      | 66.05%      | 94.40%      | 94.34%      | 93.25%      | 68.37%      | 68.37%      | 68.41%      | 68.33%      | 68.37%      | 68.39%      | 67.55%      | 68.22%      | 67.68%     | 67.60%     | 67.82%      | 68.01%      | 67.99%      | 67.99%      | 67.99%      |
| 66.04%      | 65.95%      | 66.24%      | 66.26%      | 66.05%      | 65.99%      | 66.02%      | 93.87%      | 93.81%      | 92.25%      | 68.26%      | 68.27%      | 68.31%      | 68.24%      | 68.25%      | 68.29%      | 68.32%      | 67.56%      | 68.15%     | 67.68%     | 67.60%      | 67.80%      | 67.94%      | 67.94%      | 67.94%      |
| 66.08%      | 66.13%      | 64.38%      | 63.50%      | 63.80%      | 66.04%      | 66.02%      | 68.27%      | 68.26%      | 68.37%      | 68.26%      | 98.17%      | 98.50%      | 98.81%      | 98.39%      | 72.00%      | 71.97%      | 71.59%      | 71.92%     | 71.70%     | 71.52%      | 71.70%      | 72.05%      | 72.05%      | 72.05%      |
| 65.97%      | 66.03%      | 64.23%      | 63.03%      | 63.32%      | 65.99%      | 65.98%      | 68.15%      | 68.16%      | 68.37%      | 68.27%      | 98.17%      | 99.01%      | 98.61%      | 98.18%      | 71.83%      | 71.90%      | 71.45%      | 71.80%     | 71.63%     | 71.42%      | 71.57%      | 71.95%      | 71.91%      | 71.91%      |
| 66.13%      | 66.15%      | 64.28%      | 63.16%      | 63.46%      | 66.10%      | 66.12%      | 68.18%      | 68.19%      | 68.41%      | 68.31%      | 98.50%      | 99.01%      | 99.03%      | 98.60%      | 71.99%      | 71.88%      | 71.60%      | 71.80%     | 71.70%     | 71.49%      | 71.68%      | 72.03%      | 72.02%      | 72.02%      |
| 66.14%      | 66.21%      | 64.28%      | 63.10%      | 63.39%      | 66.12%      | 66.15%      | 68.18%      | 68.21%      | 68.33%      | 68.24%      | 98.81%      | 98.61%      | 99.03%      | 99.51%      | 71.86%      | 71.86%      | 71.54%      | 71.82%     | 71.59%     | 71.45%      | 71.60%      | 71.96%      | 71.94%      | 71.94%      |
| 66.10%      | 66.19%      | 64.02%      | 63.23%      | 63.52%      | 66.06%      | 66.09%      | 68.17%      | 68.20%      | 68.37%      | 68.25%      | 98.39%      | 98.18%      | 98.60%      | 99.51%      | 71.89%      | 71.90%      | 71.58%      | 71.81%     | 71.61%     | 71.49%      | 71.64%      | 71.99%      | 71.98%      | 71.98%      |
| 65.75%      | 65.66%      | 64.02%      | 63.84%      | 63.66%      | 65.57%      | 65.58%      | 68.13%      | 68.30%      | 68.32%      | 68.29%      | 72.00%      | 71.83%      | 71.99%      | 71.86%      | 71.89%      | 91.42%      | 91.20%      | 91.96%     | 91.30%     | 91.07%      | 91.34%      | 91.62%      | 91.62%      | 91.62%      |
| 65.76%      | 65.79%      | 64.23%      | 64.78%      | 64.41%      | 65.66%      | 65.67%      | 68.05%      | 68.09%      | 68.39%      | 68.32%      | 71.97%      | 71.90%      | 71.88%      | 71.90%      | 91.42%      | 91.42%      | 96.03%      | 97.19%     | 96.45%     | 96.40%      | 96.67%      | 96.87%      | 96.90%      | 96.90%      |
| 65.66%      | 65.50%      | 64.69%      | 64.98%      | 64.55%      | 65.45%      | 65.47%      | 67.42%      | 67.36%      | 67.55%      | 67.56%      | 71.59%      | 71.45%      | 71.60%      | 71.54%      | 71.58%      | 91.20%      | 96.03%      | 96.72%     | 97.28%     | 97.22%      | 97.33%      | 97.49%      | 97.49%      | 97.49%      |
| 65.83%      | 65.79%      | 64.18%      | 64.31%      | 64.07%      | 65.68%      | 65.69%      | 67.95%      | 68.01%      | 68.22%      | 68.15%      | 71.92%      | 71.80%      | 71.80%      | 71.82%      | 71.81%      | 91.96%      | 97.19%      | 96.72%     | 97.12%     | 96.99%      | 97.24%      | 97.50%      | 97.52%      | 97.52%      |
| 65.67%      | 65.56%      | 64.95%      | 64.98%      | 64.55%      | 65.49%      | 65.53%      | 67.52%      | 67.45%      | 67.68%      | 67.68%      | 71.70%      | 71.63%      | 71.70%      | 71.59%      | 71.61%      | 91.30%      | 96.45%      | 97.28%     | 97.12%     | 96.46%      | 96.78%      | 96.88%      | 99.06%      | 99.06%      |
| 65.67%      | 65.58%      | 64.74%      | 64.92%      | 64.62%      | 65.50%      | 65.53%      | 67.48%      | 67.41%      | 67.60%      | 67.60%      | 71.52%      | 71.42%      | 71.49%      | 71.45%      | 71.49%      | 91.07%      | 96.40%      | 97.22%     | 96.99%     | 96.46%      | 96.87%      | 99.31%      | 99.17%      | 98.39%      |
| 65.82%      | 65.72%      | 64.79%      | 65.05%      | 64.75%      | 65.66%      | 65.69%      | 67.66%      | 67.57%      | 67.82%      | 67.80%      | 71.70%      | 71.57%      | 71.68%      | 71.60%      | 71.64%      | 91.34%      | 96.53%      | 97.33%     | 97.24%     | 96.78%      | 96.99%      | 99.31%      | 99.46%      | 99.18%      |
| 66.01%      | 65.92%      | 64.54%      | 64.92%      | 64.48%      | 65.82%      | 65.85%      | 67.73%      | 67.77%      | 68.01%      | 67.94%      | 72.05%      | 71.95%      | 72.03%      | 71.96%      | 71.99%      | 91.62%      | 96.87%      | 97.49%     | 97.50%     | 98.88%      | 99.17%      | 99.46%      | 99.41%      | 99.41%      |
| 65.96%      | 65.86%      | 64.69%      | 64.98%      | 64.55%      | 65.78%      | 65.83%      | 67.77%      | 67.80%      | 67.99%      | 67.94%      | 72.05%      | 71.91%      | 72.02%      | 71.94%      | 71.98%      | 91.62%      | 96.90%      | 97.49%     | 97.52%     | 99.06%      | 98.89%      | 99.18%      | 99.41%      | 99.41%      |

**Supplementary Figure 1.** Phylogenetic tree of sequences of the four dengue virus serotypes. **A)** Circular tree (genetic distance model- Tamura-Nei) method Neighbor-joining. We present the genetic relationships between the four dengue virus serotypes using isolated sequences obtained in Mexico or USA. The study incorporates isolates from DV4 patients and the reference strain of DV2 New Guinea (FJ390389.1). Additionally, a matrix of distances **B)** between the four serotypes of dengue virus is displayed, highlighting a genetic distance of 66% between DV2 and DV4.

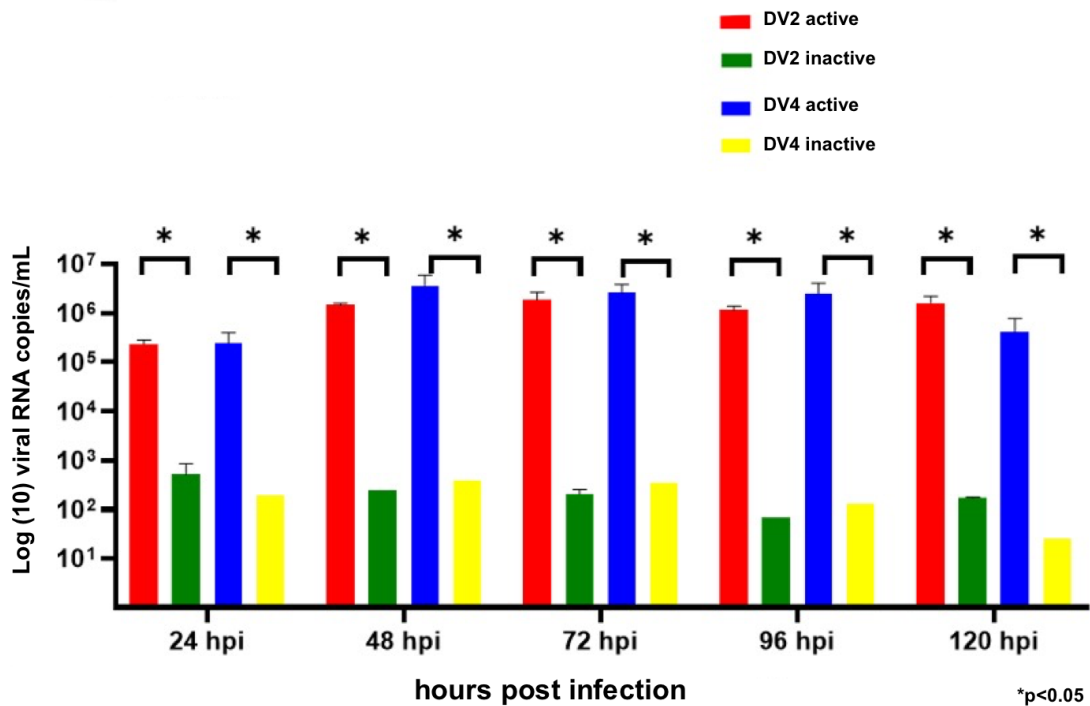

**Supplementary Figure 2. Kinetics of C6/36 cell infection with dengue virus serotypes 2 and 4.** The graph shows on the Y axis the number of copies of viral RNA/ml. detected in the supernatant of C6/36 cells infected with dengue virus serotypes 2 (DV2) and 4 (DV4), while the X axis shows the time points at which each of the supernatants of these infected cells were collected. The first two bars at each time point correspond to infection with DV2 in active state (red color) and in state exposed to UV light for 3 hours (green color). The third bar at each time point (blue) corresponds to the infection made in C6/36 cells infected with DV4 in the active state, while the bar in yellow represents the supernatant of C6/36 cells exposed to DV4 that was previously irradiated with UV light. C6/36 cell infection data were analyzed by applying a 2-way ANOVA of multiple comparisons of Tukey. The statistical test was subject to a value of  $p < 0.05$  for a significant difference. The data were analyzed and plotted in the *GraphPad Prism version 6.1 program*.

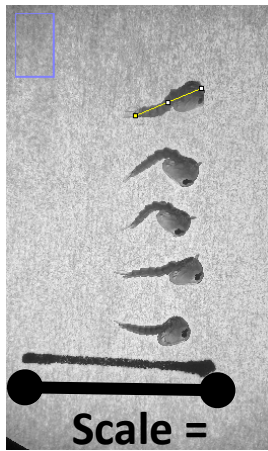

10 mm

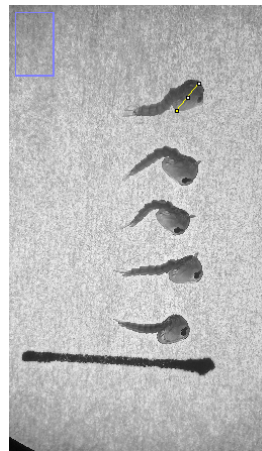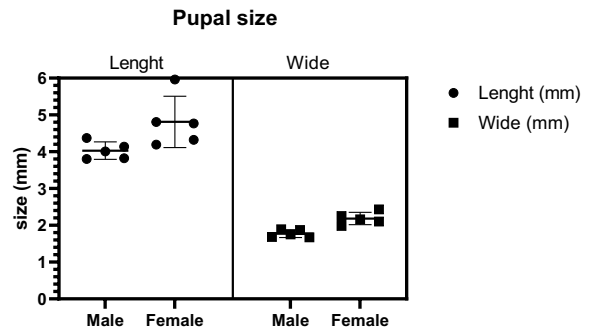

**Supplementary Figure 3.** Body measurements of 5 pupae per sex. The width and length of the pupae were measured with the help of the ImageJ program, using a 10 mm scale as a reference.

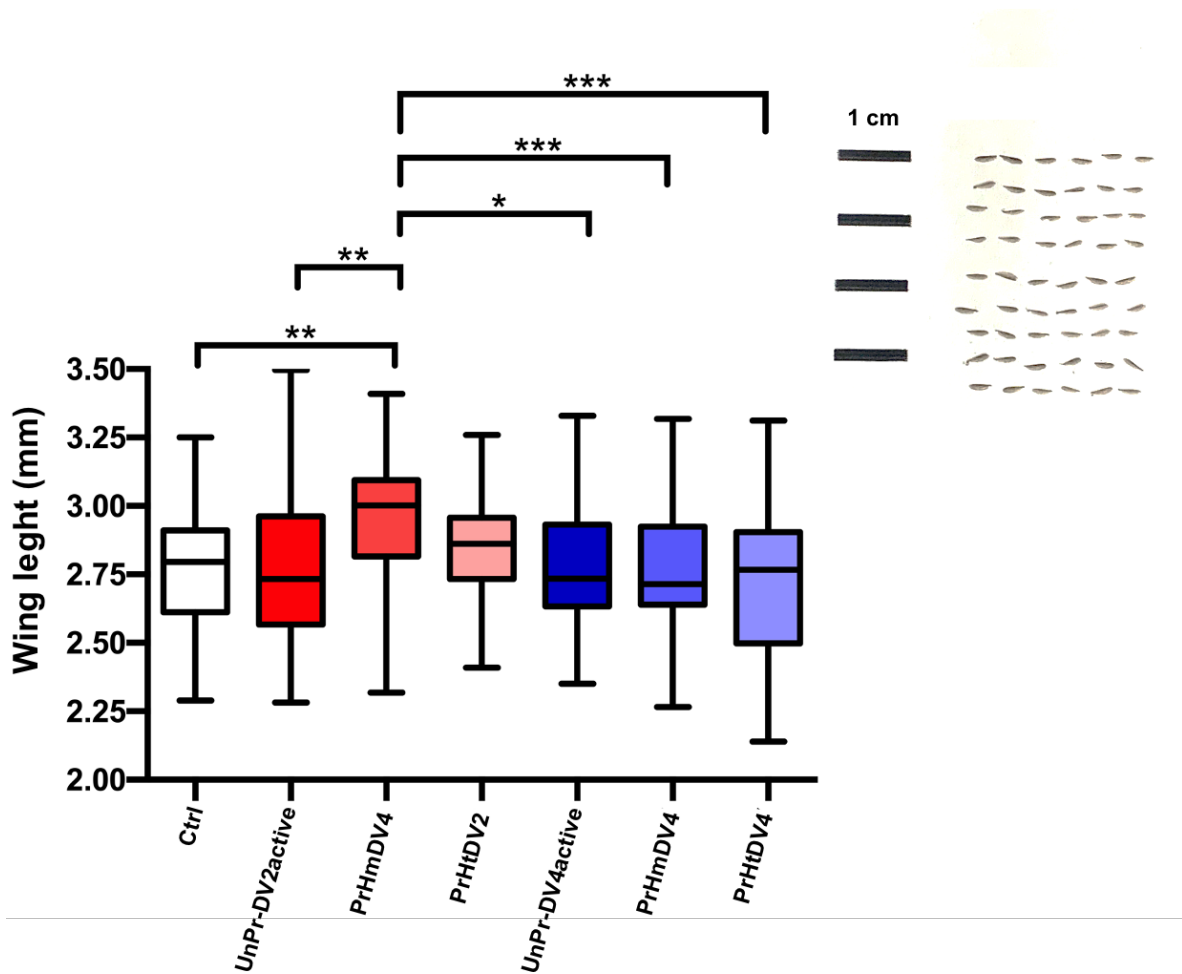

**Supplementary Figure 4.** Wing length of 30 individuals for each of the treatments, showing significant differences between the UnPrDV2active group and the rest of the groups. *P*-values represent the statistical significance based on *Tukey's Multiple Comparison Test* ( $*p < 0.01$ ;  $**p < 0.001$ ).

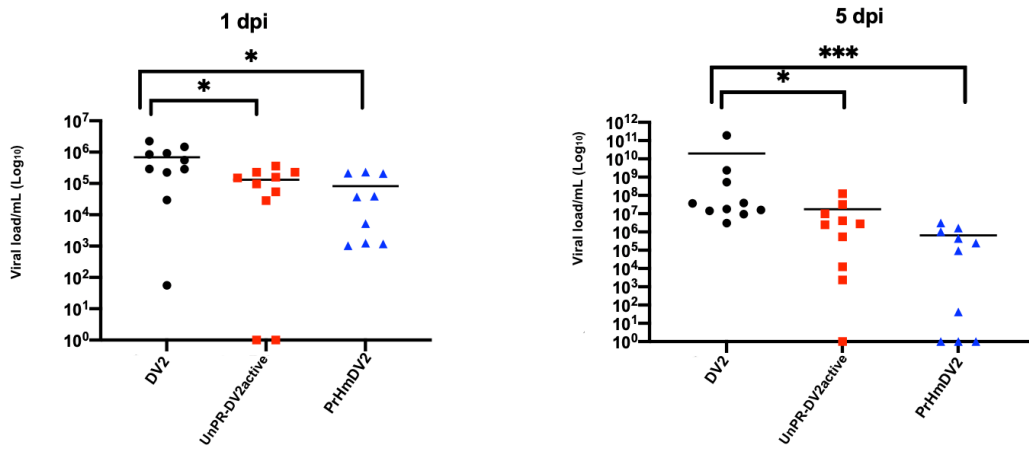

**Supplementary Figure 5.** Analysis of Viral load of DV in progeny (F1), at one and five days post-infection (dpi) with DV2. *P*-values represent the statistical significance based on *Tukey's Multiple Comparison Test* (\**p* < 0.01; \*\*\**p* < 0.0001).

**A**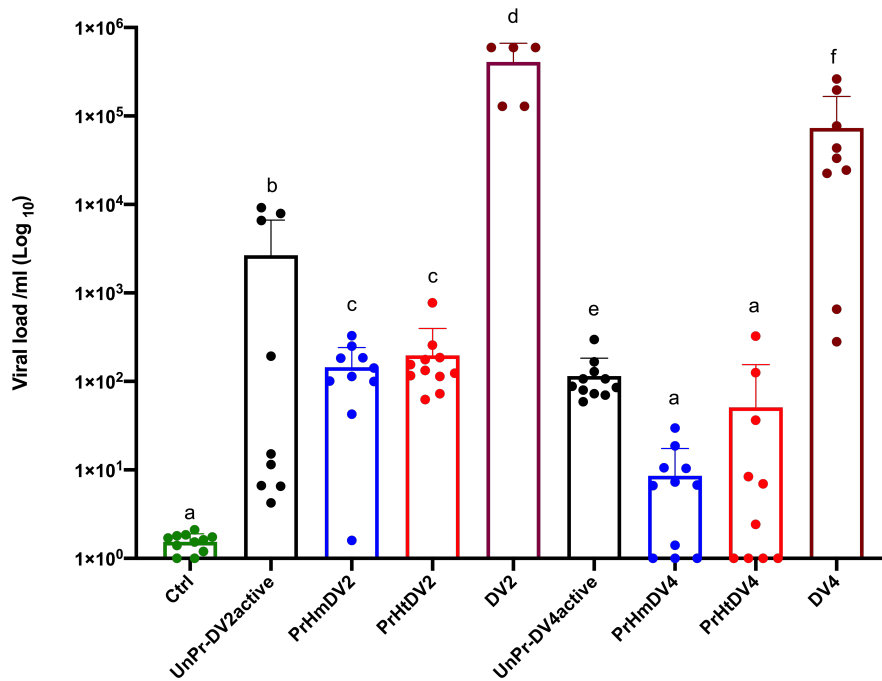**B**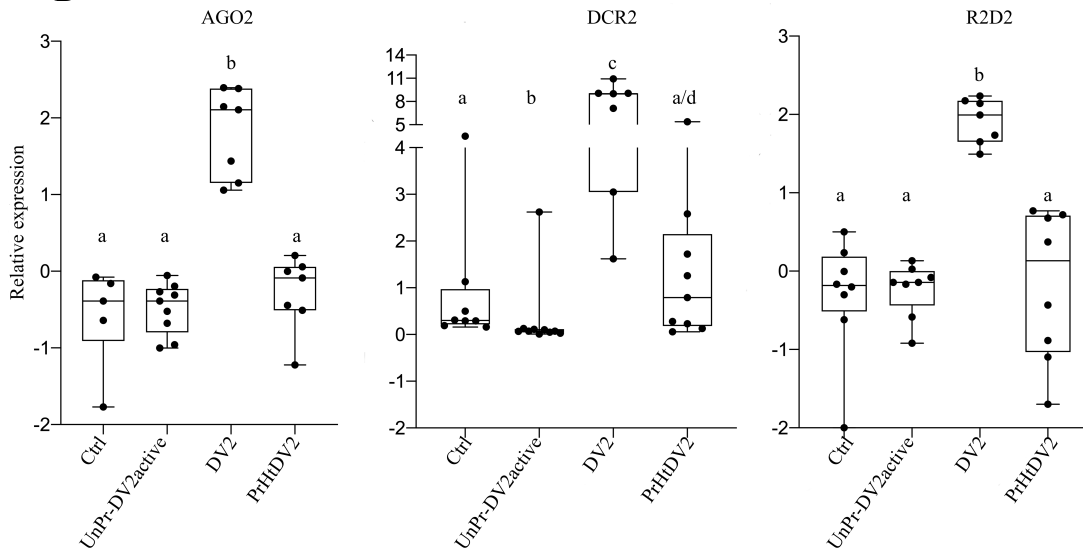

**Supplementary Figure 6.** Analysis of **A**) Viral load of DV and **B**) Relative expression of antiviral immune response genes [siRNA: Argonaute (AGO2), Dicer 2 (DCR2) and R2D2] in progeny (F1) per treatment, at five days post-infection (dpi) with DV serotype 2 (DV2) and 4 (DV4). PrHm (priming-mothers with DVinactive and challenged with DVactive with the same serotype); PrHt (priming-mothers with DVinactive and challenged with DVactive with different serotypes); UnPr-DVactive (not priming-mothers with DVinactive, but challenged with DVactive for each serotype, respectively); DV2 (infection control with dengue virus serotype 2); DV4 (infection control with dengue virus serotype 4) and Ctrl (mothers that have never been exposed with DV). *P*-values represent the statistical significance based on *Mann-Whitney U test*; different letters represent significant values ( $p < 0.05$ ), while equal letters are non-significant values.

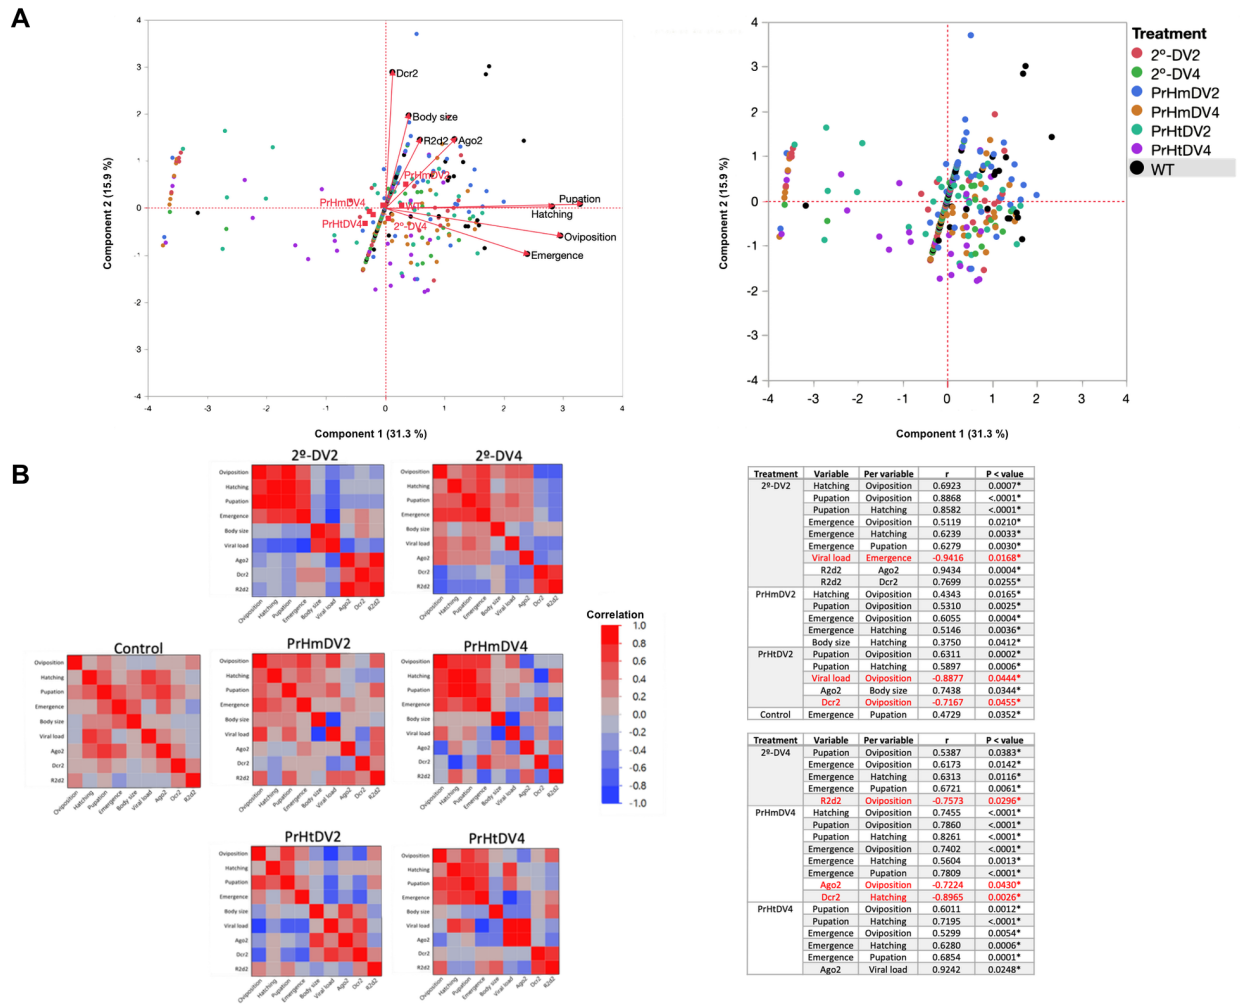

**Supplementary Figure 7. A) Principal Analysis Components (PCA), B) Correlation matrix** by treatment blue negative correlation, red positive correlation. *P*-values represent the statistical significance based on the *Chi-square X<sup>2</sup> test* (\**p* < 0.01). In the table, in red, we show the correlation between immune factors and biological factors.
